# Supplementary material for: Direct influence of hydrogen-bonding on the reduction potential of a CuII center
Source: Royal Society of Chemistry journal article supplement (doi:10.1039/b517340j), 2006-01-01
Supplement: b517340j.pdf [file b517340j.pdf]

## Electronic Supplementary Information

Direct influence of hydrogen-bonding on the reduction potential of a Cu<sup>II</sup> Centers

Thorsten Glaser\*, Ioannis Liratzis, Olga Kataeva, Roland Fröhlich, Manuel Piacenza,  
and Stefan Grimme

### 1. Experimental Section

1.1. Preparation of [(H<sub>2</sub>L<sup>OH</sup>)Cu<sup>II</sup>]

1.2. Preparation of [L<sup>H</sup>Cu<sup>II</sup>]

1.3. Single-crystal X-ray diffraction analysis of [(H<sub>2</sub>L<sup>OH</sup>)Cu<sup>II</sup>] and [L<sup>H</sup>Cu<sup>II</sup>]

### 2. Details of Electronic Structure Calculations

## 1. Experimental Section

Both complexes have been synthesized by starting from the respective ligand and copper acetate. However, the template reactions described below resulted in microcrystalline materials of higher yields.

$[(H_2L^{OH})Cu^{II}]$ : A solution of  $Cu(OAc)_2 \cdot H_2O$  (80 mg, 0.40 mmol) in ethanol (30 mL) was added slowly to a stirred solution of 2-formyl-1,8-naphthalenediol (150 mg, 0.80 mmol) in  $CHCl_3$  (10 mL) resulting in a brown suspension. After addition of a solution of 1,3-diaminopropane (30 mg, 0.40 mmol) in  $CHCl_3$  (6 mL), the mixture was heated to reflux for 30 minutes. Upon stirring overnight at room temperature, brown microcrystals separated which were washed with diethyl ether and dried in vacuum. Yield: 180 mg (95 %). Single-crystals suitable for single-crystal X-ray diffraction were obtained by slow evaporation of a solution of  $[(H_2L^{OH})Cu^{II}]$  in  $CH_2Cl_2$ . MALDI-TOF MS of  $[(H_2L^{OH})Cu^{II}]$ :  $m/z$  (%): 475 (100)  $[(H_2L^{OH})Cu^{II}]^+$ ; IR (KBr):  $\tilde{\nu} = 1611$  (C=N); elemental analysis calcd for  $C_{25}H_{20}N_2O_4Cu$  ( $[(H_2L^{OH})Cu^{II}]$ ) (%): C 63.08, H 4.24, N 5.89; found: C 63.26, H 4.03, N 5.80.

$[L^HCu^{II}]$ : A stirred suspension of 2-formyl-1-naphthol (120 mg, 0.70 mmol) in methanol (30 mL) was subsequently treated with a solution of 1,3-diaminopropane (26 mg, 0.35 mmol) in methanol (5 mL) and solid  $Cu(OAc)_2 \cdot H_2O$  (70 mg, 0.35 mmol). The resulting olive-green solution was heated to reflux for 30 minutes. Brownish-green microcrystals separated upon cooling. Yield: 100 mg (65 %). Single-crystals suitable for single-crystal X-ray diffraction were obtained by slow evaporation of a solution of  $[L^HCu^{II}]$  in a  $CH_2Cl_2/MeOH$  (3:1) mixture. MALDI-TOF MS of  $[L^HCu^{II}]$ :  $m/z$  (%): 443 (100)  $[L^HCu^{II}]^+$ ; IR (KBr):  $\tilde{\nu} = 1621$  (C=N); elemental analysis calcd for  $C_{25}H_{21}N_2O_{2.5}Cu$  ( $[L^HCu^{II}] \cdot 0.5H_2O$ ) (%): C 66.29, H 4.67, N 6.18; found: C 66.30, H 4.46, N 5.97.

X-ray crystal structure analysis for  $[(\text{H}_2\text{L}^{\text{OH}})\text{Cu}^{\text{II}}]$ : formula  $\text{C}_{25}\text{H}_{20}\text{N}_2\text{O}_4\text{Cu}$ ,  $M = 475.97$ , brown crystal  $0.23 \times 0.08 \times 0.07$  mm,  $a = 22.210(2)$ ,  $b = 10.2458(11)$ ,  $c = 17.7739(19)$  Å,  $\beta = 100.842(2)^\circ$ ,  $V = 3972.4(7)$  Å<sup>3</sup>,  $\rho_{\text{calc}} = 1.592$  g cm<sup>-3</sup>,  $\mu = 1.14$  mm<sup>-1</sup>, no absorption correction,  $Z = 8$ , monoclinic, space group  $\text{C}2/c$  (No. 15),  $\lambda = 0.71073$  Å,  $T = 153$  K,  $\omega$  and  $\varphi$  scans, 18963 reflections collected ( $\pm h, \pm k, \pm l$ ),  $[(\sin\theta)/\lambda] = 0.65$  Å<sup>-1</sup>, 4547 independent ( $R_{\text{int}} = 0.072$ ) and 3271 observed reflections [ $I \geq 2 \sigma(I)$ ], 369 refined parameters,  $R = 0.036$ ,  $wR^2 = 0.067$ , max. residual electron density 0.59 (-0.30) e Å<sup>-3</sup>, hydrogen atoms located from difference Fourier maps and refined independently. X-ray crystal structure analysis for  $[\text{L}^{\text{H}}\text{Cu}^{\text{II}}]$ : formula  $\text{C}_{25}\text{H}_{20}\text{N}_2\text{O}_2\text{Cu}$ ,  $M = 443.97$ , orange crystal  $0.40 \times 0.20 \times 0.06$  mm,  $a = 22.060(1)$ ,  $b = 10.158(1)$ ,  $c = 17.598(1)$  Å,  $\beta = 100.97(1)^\circ$ ,  $V = 3871.4(5)$  Å<sup>3</sup>,  $\rho_{\text{calc}} = 1.523$  g cm<sup>-3</sup>,  $\mu = 1.15$  mm<sup>-1</sup>, empirical absorption correction ( $0.655 \leq T \leq 0.934$ ),  $Z = 8$ , monoclinic, space group  $\text{C}2/c$  (No. 15),  $\lambda = 0.71073$  Å,  $T = 198$  K,  $\omega$  and  $\varphi$  scans, 15324 reflections collected ( $\pm h, \pm k, \pm l$ ),  $[(\sin\theta)/\lambda] = 0.66$  Å<sup>-1</sup>, 4601 independent ( $R_{\text{int}} = 0.051$ ) and 3542 observed reflections [ $I \geq 2 \sigma(I)$ ], 271 refined parameters,  $R = 0.036$ ,  $wR^2 = 0.094$ , max. residual electron density 0.37 (-0.40) e Å<sup>-3</sup>, hydrogen atoms calculated and refined as riding atoms. Data sets were collected with Bruker AXS APEX and Nonius KappaCCD diffractometers, both equipped with rotating anode generators. Programs used: data collection SMART<sup>[1]</sup> and COLLECT<sup>[2]</sup>, data reduction SAINT<sup>[1]</sup> and Denzo-SMN<sup>[3]</sup>, absorption correction<sup>[4]</sup> structure solution SHELXS-97<sup>[5]</sup>, structure refinement SHELXL-97<sup>[6]</sup>. CCDC 273718 & 273719 contain the supplementary crystallographic data for this paper. These data can be obtained free of charge at [www.ccdc.cam.ac.uk/conts/retrieving.html](http://www.ccdc.cam.ac.uk/conts/retrieving.html) [or from the Cambridge Crystallographic Data Centre, 12 Union Road, Cambridge CB2 1EZ, UK; fax: (internat.) +44(1223)336-033, E-mail: deposit@ccdc.cam.ac.uk].

[1] SMART&SAINT, Bruker AXS, **2000**.

[2] COLLECT, Nonius B. V., **1998**.

[3] Z. Otwinowski, W. Minor, *Methods Enzymol.* **1997**, 276, 307-326.

[4] a) R. H. Blessing, *Acta Cryst.* **1995**, A51, 33-37; b) R. H. Blessing, *J. Appl. Cryst.* **1997**, 30, 421-426.

[5] G. M. Sheldrick, *Acta Cryst.* **1990**, A46, 467-473.

[6] SHELXL-97; Sheldrick, G. M.; Universität Göttingen, **1997**

## 2. Details of Electronic Structure Calculations

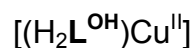

Cartesian Coordinates (Angstroems)

-----

|    |    |           |           |           |
|----|----|-----------|-----------|-----------|
| 1  | c  | -4.639234 | 3.686019  | -0.669787 |
| 2  | c  | -3.273619 | 3.632986  | -0.900507 |
| 3  | c  | -2.579281 | 2.463590  | -0.690951 |
| 4  | c  | -3.259576 | 1.307548  | -0.227446 |
| 5  | c  | -4.657100 | 1.381365  | -0.012854 |
| 6  | c  | -5.328857 | 2.584913  | -0.234177 |
| 7  | c  | -5.361171 | 0.219424  | 0.418175  |
| 8  | c  | -4.710897 | -0.940052 | 0.604498  |
| 9  | c  | -3.305171 | -1.054903 | 0.406043  |
| 10 | c  | -2.566897 | 0.071837  | 0.012407  |
| 11 | o  | -1.290428 | 0.028501  | -0.152102 |
| 12 | cu | -0.012325 | -1.398548 | 0.104013  |
| 13 | o  | 1.317804  | -0.022839 | 0.335340  |
| 14 | c  | 2.565450  | 0.006570  | 0.022073  |
| 15 | c  | 3.226677  | -1.119567 | -0.493238 |
| 16 | c  | 4.594205  | -1.013639 | -0.880001 |
| 17 | c  | 5.280922  | 0.132204  | -0.751245 |
| 18 | c  | 4.662281  | 1.286804  | -0.188097 |
| 19 | c  | 3.305577  | 1.223034  | 0.211192  |
| 20 | c  | 5.378504  | 2.472404  | -0.017644 |
| 21 | c  | 4.773348  | 3.565274  | 0.546432  |
| 22 | c  | 3.450817  | 3.521162  | 0.957682  |
| 23 | c  | 2.713993  | 2.369309  | 0.802194  |
| 24 | c  | 2.617546  | -2.389497 | -0.572115 |
| 25 | n  | 1.408047  | -2.747717 | -0.297033 |
| 26 | c  | 1.175154  | -4.190528 | -0.320157 |
| 27 | c  | -0.273897 | -4.585405 | -0.492545 |
| 28 | c  | -1.172704 | -4.086537 | 0.624448  |
| 29 | n  | -1.482250 | -2.676048 | 0.467046  |

|    |   |           |           |           |
|----|---|-----------|-----------|-----------|
| 30 | c | -2.717330 | -2.327422 | 0.576352  |
| 31 | o | 1.453139  | 2.377974  | 1.231567  |
| 32 | o | -1.271832 | 2.465979  | -0.944893 |
| 33 | h | 3.293688  | -3.178025 | -0.888831 |
| 34 | h | -3.425688 | -3.114966 | 0.813063  |
| 35 | h | 1.531672  | -4.612447 | 0.618434  |
| 36 | h | 1.766040  | -4.640314 | -1.113975 |
| 37 | h | -2.093158 | -4.663382 | 0.641207  |
| 38 | h | -0.678215 | -4.243911 | 1.581250  |
| 39 | h | -0.656291 | -4.236800 | -1.447291 |
| 40 | h | -0.313002 | -5.670594 | -0.511086 |
| 41 | h | 5.075657  | -1.887504 | -1.285773 |
| 42 | h | -5.252946 | -1.817424 | 0.915318  |
| 43 | h | 6.310425  | 0.195459  | -1.053389 |
| 44 | h | -6.421598 | 0.289517  | 0.578770  |
| 45 | h | 2.973758  | 4.373708  | 1.403894  |
| 46 | h | 1.053087  | 1.524126  | 1.017267  |
| 47 | h | 6.406860  | 2.513700  | -0.327910 |
| 48 | h | -2.729982 | 4.492100  | -1.246886 |
| 49 | h | -0.917256 | 1.594520  | -0.719856 |
| 50 | h | -6.389239 | 2.633072  | -0.064280 |
| 51 | h | 5.330865  | 4.476378  | 0.675855  |
| 52 | h | -5.162404 | 4.610893  | -0.839069 |

Total energy (BH-LYP/TZVP) = -3015.3232869190 H = -82051.1680897 eV

#### HOMO-LUMO Separation

HOMO: 245. b 122 a -0.22494391 H = -6.12104 eV

LUMO: 246. a 124 a -0.03090335 H = -0.84092 eV

Gap : +0.19404056 H = +5.28012 eV

Number of MOs= 1484, Electrons= 245.00, Symmetry: c1

| Nr.  | Orbital | Occupation | Energy                  |
|------|---------|------------|-------------------------|
| 249. | b 124 a |            | -0.024694 H = -0.672 eV |

|              |       |               |           |
|--------------|-------|---------------|-----------|
| 248. a 125 a |       | -0.025534 H = | -0.695 eV |
| 247. b 123 a |       | -0.029967 H = | -0.815 eV |
| 246. a 124 a |       | -0.030903 H = | -0.841 eV |
| 245. b 122 a | 1.000 | -0.224944 H = | -6.121 eV |
| 244. a 123 a | 1.000 | -0.225765 H = | -6.143 eV |
| 243. b 121 a | 1.000 | -0.227911 H = | -6.202 eV |
| 242. a 122 a | 1.000 | -0.228183 H = | -6.209 eV |

#### 9 a excitation

Total energy: -3015.196451134597  
Excitation energy: 0.1268349784028742  
Excitation energy / eV: 3.451356845534004  
Excitation energy / nm: 359.2333379462104  
Excitation energy / cm<sup>^-1</sup>: 27837.06004481329  
Oscillator strength:  
velocity representation: 0.4537133277698157E-01  
length representation: 0.4685123855641580E-01  
mixed representation: 0.4554017917828262E-01

#### Dominant contributions:

| occ. orbital | energy / eV | virt. orbital | energy / eV | coeff.  <sup>2</sup> *100 |
|--------------|-------------|---------------|-------------|---------------------------|
| 122 a beta   | -6.12       | 123 a beta    | -0.82       | 23.4                      |
| 123 a alpha  | -6.14       | 124 a alpha   | -0.84       | 21.5                      |
| 122 a alpha  | -6.21       | 125 a alpha   | -0.69       | 12.2                      |
| 121 a beta   | -6.20       | 124 a beta    | -0.67       | 11.7                      |
| 122 a alpha  | -6.21       | 124 a alpha   | -0.84       | 10.8                      |
| 121 a beta   | -6.20       | 123 a beta    | -0.82       | 8.3                       |
| 123 a alpha  | -6.14       | 125 a alpha   | -0.69       | 4.3                       |

#### 10 a excitation

Total energy: -3015.190109230489  
Excitation energy: 0.1331768825112158  
Excitation energy / eV: 3.623928910698239  
Excitation energy / nm: 342.1265898468734  
Excitation energy / cm<sup>^-1</sup>: 29228.94710692638  
Oscillator strength:

velocity representation: 0.4299978475764270  
length representation: 0.4219990662965832  
mixed representation: 0.4259661715721701

Dominant contributions:

| occ. orbital | energy / eV | virt. orbital | energy / eV | coeff. ^2*100 |
|--------------|-------------|---------------|-------------|---------------|
| 123 a alpha  | -6.14       | 125 a alpha   | -0.69       | 26.1          |
| 122 a beta   | -6.12       | 124 a beta    | -0.67       | 24.8          |
| 122 a alpha  | -6.21       | 124 a alpha   | -0.84       | 22.4          |
| 121 a beta   | -6.20       | 123 a beta    | -0.82       | 16.3          |
| 121 a beta   | -6.20       | 124 a beta    | -0.67       | 1.4           |

\*\*\*\*\*

$[(H_2L^{OH})Cu]^+$

Cartesian Coordinates (Angstroems)

```

-----
 1 c  -5.156619  3.567509 -0.612128
 2 c  -3.775009  3.655564 -0.710620
 3 c  -2.995438  2.533529 -0.520426
 4 c  -3.601404  1.286943 -0.219707
 5 c  -5.008905  1.218758 -0.132213
 6 c  -5.772804  2.378376 -0.329299
 7 c  -5.623981 -0.031600  0.148082
 8 c  -4.860824 -1.130610  0.324680
 9 c  -3.446592 -1.114827  0.262956
10 c  -2.778599  0.104449 -0.013097
11 o  -1.519150  0.206825 -0.096545
12 cu  0.022459 -1.284288  0.281678
13 o   1.629804  0.020413  0.586505
14 c   2.798871  0.000458  0.089401
15 c   3.361140 -1.136411 -0.537639
16 c   4.658827 -1.045739 -1.094715
17 c   5.412190  0.073204 -1.043833
18 c   4.909645  1.234562 -0.397905

```

|    |   |           |           |           |
|----|---|-----------|-----------|-----------|
| 19 | c | 3.614461  | 1.200934  | 0.163817  |
| 20 | c | 5.675286  | 2.406852  | -0.308477 |
| 21 | c | 5.173635  | 3.507015  | 0.332193  |
| 22 | c | 3.905933  | 3.493534  | 0.898476  |
| 23 | c | 3.127342  | 2.358405  | 0.824082  |
| 24 | c | 2.719987  | -2.414247 | -0.612314 |
| 25 | n | 1.572935  | -2.765330 | -0.186284 |
| 26 | c | 1.253887  | -4.172105 | -0.264791 |
| 27 | c | -0.215409 | -4.468474 | -0.512292 |
| 28 | c | -1.164709 | -4.026638 | 0.600060  |
| 29 | n | -1.541594 | -2.636850 | 0.487751  |
| 30 | c | -2.787235 | -2.370732 | 0.438803  |
| 31 | o | 1.922446  | 2.382389  | 1.386818  |
| 32 | o | -1.676687 | 2.656940  | -0.629424 |
| 33 | h | 3.346298  | -3.178748 | -1.081844 |
| 34 | h | -3.482598 | -3.208649 | 0.530227  |
| 35 | h | 1.527631  | -4.637482 | 0.683800  |
| 36 | h | 1.852073  | -4.665245 | -1.036236 |
| 37 | h | -2.052911 | -4.662469 | 0.583429  |
| 38 | h | -0.676100 | -4.185860 | 1.560231  |
| 39 | h | -0.535242 | -4.021758 | -1.448936 |
| 40 | h | -0.307005 | -5.547040 | -0.626242 |
| 41 | h | 5.056109  | -1.925855 | -1.575609 |
| 42 | h | -5.339699 | -2.075837 | 0.527415  |
| 43 | h | 6.395863  | 0.100670  | -1.478016 |
| 44 | h | -6.696571 | -0.085064 | 0.208103  |
| 45 | h | 3.505103  | 4.354933  | 1.400249  |
| 46 | h | 1.511808  | 1.507836  | 1.208935  |
| 47 | h | 6.659537  | 2.423024  | -0.742871 |
| 48 | h | -3.284672 | 4.585162  | -0.934230 |
| 49 | h | -1.293047 | 1.770087  | -0.448511 |
| 50 | h | -6.844741 | 2.316834  | -0.257875 |
| 51 | h | 5.766631  | 4.403796  | 0.398520  |
| 52 | h | -5.749494 | 4.454200  | -0.762720 |



Total energy (BH-LYP/TZVP) = -3015.3783222000 H = -82052.6656767 eV

#### HOMO-LUMO Separation

HOMO: 123. 123 a -0.10833716 H = -2.94801 eV

LUMO: 124. 124 a +0.09644682 H = +2.62445 eV

Gap : +0.20478398 H = +5.57246 eV

Number of MOs= 742, Electrons= 246.00, Symmetry: c1

\*\*\*\*\*

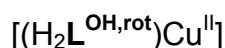

#### Cartesian Coordinates (Angstroems)

-----

|    |    |           |           |           |
|----|----|-----------|-----------|-----------|
| 1  | c  | 4.711716  | 3.662283  | 0.685538  |
| 2  | c  | 3.366992  | 3.596784  | 1.025764  |
| 3  | c  | 2.649001  | 2.437638  | 0.838977  |
| 4  | c  | 3.267981  | 1.294306  | 0.278303  |
| 5  | c  | 4.643305  | 1.377627  | -0.041891 |
| 6  | c  | 5.345023  | 2.573096  | 0.163165  |
| 7  | c  | 5.326113  | 0.241174  | -0.563854 |
| 8  | c  | 4.671763  | -0.917060 | -0.746702 |
| 9  | c  | 3.286317  | -1.048034 | -0.468791 |
| 10 | c  | 2.546155  | 0.058642  | 0.016687  |
| 11 | o  | 1.307399  | -0.009181 | 0.230405  |
| 12 | cu | 0.009835  | -1.387498 | -0.093411 |
| 13 | o  | -1.334553 | -0.054710 | -0.378387 |
| 14 | c  | -2.549010 | -0.003125 | -0.055829 |
| 15 | c  | -3.218098 | -1.112802 | 0.518505  |
| 16 | c  | -4.565072 | -0.989060 | 0.950739  |
| 17 | c  | -5.249572 | 0.158627  | 0.822084  |
| 18 | c  | -4.644796 | 1.291320  | 0.202907  |
| 19 | c  | -3.314310 | 1.215131  | -0.270180 |
| 20 | c  | -5.379823 | 2.474629  | 0.053674  |

|    |   |           |           |           |
|----|---|-----------|-----------|-----------|
| 21 | c | -4.822681 | 3.558468  | -0.559625 |
| 22 | c | -3.524961 | 3.498681  | -1.049954 |
| 23 | c | -2.777647 | 2.349691  | -0.924341 |
| 24 | c | -2.608852 | -2.379191 | 0.621380  |
| 25 | n | -1.403355 | -2.744522 | 0.332977  |
| 26 | c | -1.167264 | -4.184576 | 0.382033  |
| 27 | c | 0.289523  | -4.574130 | 0.504597  |
| 28 | c | 1.149996  | -4.079396 | -0.645753 |
| 29 | n | 1.467034  | -2.671224 | -0.498372 |
| 30 | c | 2.698719  | -2.318946 | -0.640022 |
| 31 | o | -1.538203 | 2.294279  | -1.437843 |
| 32 | o | 1.357141  | 2.382834  | 1.201523  |
| 33 | h | -3.279701 | -3.158594 | 0.972699  |
| 34 | h | 3.400973  | -3.101556 | -0.911873 |
| 35 | h | -1.560081 | -4.631798 | -0.530586 |
| 36 | h | -1.724195 | -4.617978 | 1.209787  |
| 37 | h | 2.067348  | -4.660565 | -0.695090 |
| 38 | h | 0.619600  | -4.236778 | -1.583456 |
| 39 | h | 0.704278  | -4.214923 | 1.441816  |
| 40 | h | 0.332944  | -5.659222 | 0.531735  |
| 41 | h | -5.037000 | -1.848784 | 1.397006  |
| 42 | h | 5.199692  | -1.778627 | -1.121163 |
| 43 | h | -6.264885 | 0.240556  | 1.164526  |
| 44 | h | 6.372695  | 0.329205  | -0.791424 |
| 45 | h | -3.097050 | 4.351563  | -1.550135 |
| 46 | h | -1.324622 | 3.133259  | -1.834354 |
| 47 | h | -6.388153 | 2.511438  | 0.424320  |
| 48 | h | 2.876136  | 4.455415  | 1.453131  |
| 49 | h | 1.094825  | 3.227149  | 1.555186  |
| 50 | h | 6.388464  | 2.614416  | -0.091981 |
| 51 | h | -5.387468 | 4.466934  | -0.673288 |
| 52 | h | 5.251067  | 4.579664  | 0.842906  |

Total energy (BH-LYP/TZVP) = -3015.2805172830 H = -82050.0042680 eV  
HOMO-LUMO Separation

HOMO: 245. b 122 a -0.21548299 H = -5.86359 eV  
 LUMO: 246. a 124 a -0.01552373 H = -0.42242 eV  
 Gap : +0.19995926 H = +5.44117 eV

Number of MOs= 1484, Electrons= 245.00, Symmetry: c1

| Nr.  | Orbital | Occupation | Energy                  |
|------|---------|------------|-------------------------|
| 249. | b 124 a |            | -0.009931 H = -0.270 eV |
| 248. | a 125 a |            | -0.010807 H = -0.294 eV |
| 247. | b 123 a |            | -0.014609 H = -0.398 eV |
| 246. | a 124 a |            | -0.015524 H = -0.422 eV |
| 245. | b 122 a | 1.000      | -0.215483 H = -5.864 eV |
| 244. | a 123 a | 1.000      | -0.216872 H = -5.901 eV |
| 243. | b 121 a | 1.000      | -0.220642 H = -6.004 eV |
| 242. | a 122 a | 1.000      | -0.220914 H = -6.011 eV |

#### 9 a excitation

Total energy: -3015.149560104329  
 Excitation energy: 0.1309571786710959  
 Excitation energy / eV: 3.563527670124665  
 Excitation energy / nm: 347.9255824106760  
 Excitation energy / cm<sup>(-1)</sup>: 28741.77842635269  
 Oscillator strength:  
 velocity representation: 0.6530799258233349E-01  
 length representation: 0.6954286777226145E-01  
 mixed representation: 0.6693747381102832E-01

#### Dominant contributions:

| occ. orbital | energy / eV | virt. orbital | energy / eV | coeff.  <sup>2</sup> *100 |
|--------------|-------------|---------------|-------------|---------------------------|
| 122 a beta   | -5.86       | 123 a beta    | -0.40       | 24.8                      |
| 123 a alpha  | -5.90       | 124 a alpha   | -0.42       | 23.2                      |
| 122 a alpha  | -6.01       | 125 a alpha   | -0.29       | 11.7                      |
| 121 a beta   | -6.00       | 124 a beta    | -0.27       | 10.8                      |
| 122 a alpha  | -6.01       | 124 a alpha   | -0.42       | 9.6                       |
| 121 a beta   | -6.00       | 123 a beta    | -0.40       | 7.5                       |
| 123 a alpha  | -5.90       | 125 a alpha   | -0.29       | 4.4                       |

12 a excitation

Total energy: -3015.142959147430  
 Excitation energy: 0.1375581355696421  
 Excitation energy / eV: 3.743148923392101  
 Excitation energy / nm: 331.2297921988951  
 Excitation energy / cm<sup>(-1)</sup>: 30190.52100392774  
 Oscillator strength:  
   velocity representation: 0.5012853144278867  
   length representation: 0.5003717577774971  
   mixed representation: 0.5008186896350887

Dominant contributions:

| occ. orbital | energy / eV | virt. orbital | energy / eV | coeff.  <sup>2</sup> *100 |
|--------------|-------------|---------------|-------------|---------------------------|
| 122 a beta   | -5.86       | 124 a beta    | -0.27       | 27.1                      |
| 123 a alpha  | -5.90       | 125 a alpha   | -0.29       | 25.7                      |
| 121 a beta   | -6.00       | 123 a beta    | -0.40       | 17.3                      |
| 122 a alpha  | -6.01       | 124 a alpha   | -0.42       | 17.2                      |
| 121 a beta   | -6.00       | 124 a beta    | -0.27       | 3.0                       |

\*\*\*\*\*

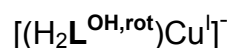

Cartesian Coordinates (Angstroems)

-----

|    |   |          |           |           |
|----|---|----------|-----------|-----------|
| 1  | c | 5.315142 | 3.488037  | 0.632532  |
| 2  | c | 3.939575 | 3.620077  | 0.781824  |
| 3  | c | 3.106367 | 2.534726  | 0.607251  |
| 4  | c | 3.627133 | 1.265987  | 0.265235  |
| 5  | c | 5.031457 | 1.154449  | 0.123148  |
| 6  | c | 5.855474 | 2.279870  | 0.309623  |
| 7  | c | 5.614092 | -0.097168 | -0.204664 |
| 8  | c | 4.823018 | -1.179322 | -0.384775 |
| 9  | c | 3.421076 | -1.138179 | -0.278490 |
| 10 | c | 2.756711 | 0.090434  | 0.057287  |

|    |    |           |           |           |
|----|----|-----------|-----------|-----------|
| 11 | o  | 1.529862  | 0.179328  | 0.176300  |
| 12 | cu | -0.042028 | -1.213822 | -0.344143 |
| 13 | o  | -1.718303 | -0.116199 | -0.742630 |
| 14 | c  | -2.811209 | -0.047750 | -0.157384 |
| 15 | c  | -3.353384 | -1.128740 | 0.609574  |
| 16 | c  | -4.576545 | -0.973470 | 1.283733  |
| 17 | c  | -5.304587 | 0.167021  | 1.248045  |
| 18 | c  | -4.842842 | 1.271683  | 0.489628  |
| 19 | c  | -3.623188 | 1.179230  | -0.224884 |
| 20 | c  | -5.600741 | 2.457703  | 0.450047  |
| 21 | c  | -5.175718 | 3.527134  | -0.277494 |
| 22 | c  | -3.985511 | 3.455876  | -0.994048 |
| 23 | c  | -3.225046 | 2.306294  | -0.981424 |
| 24 | c  | -2.722608 | -2.411084 | 0.709403  |
| 25 | n  | -1.622675 | -2.802762 | 0.204239  |
| 26 | c  | -1.289647 | -4.195696 | 0.355390  |
| 27 | c  | 0.196683  | -4.458234 | 0.531717  |
| 28 | c  | 1.075614  | -3.996442 | -0.631536 |
| 29 | n  | 1.478979  | -2.615953 | -0.503687 |
| 30 | c  | 2.731574  | -2.373569 | -0.471039 |
| 31 | o  | -2.092262 | 2.259962  | -1.708283 |
| 32 | o  | 1.778972  | 2.693460  | 0.767602  |
| 33 | h  | -3.306931 | -3.131169 | 1.293664  |
| 34 | h  | 3.407676  | -3.223548 | -0.598497 |
| 35 | h  | -1.609534 | -4.722848 | -0.545945 |
| 36 | h  | -1.835530 | -4.649073 | 1.189776  |
| 37 | h  | 1.954913  | -4.642998 | -0.691848 |
| 38 | h  | 0.521815  | -4.120396 | -1.560431 |
| 39 | h  | 0.553154  | -3.991868 | 1.445058  |
| 40 | h  | 0.321048  | -5.533125 | 0.651841  |
| 41 | h  | -4.942922 | -1.813026 | 1.854631  |
| 42 | h  | 5.278952  | -2.127661 | -0.625564 |
| 43 | h  | -6.234301 | 0.252108  | 1.781832  |
| 44 | h  | 6.683095  | -0.165805 | -0.299765 |
| 45 | h  | -3.654105 | 4.297632  | -1.580479 |

|    |   |           |          |           |
|----|---|-----------|----------|-----------|
| 46 | h | -1.945073 | 3.116055 | -2.096868 |
| 47 | h | -6.522039 | 2.500527 | 1.004356  |
| 48 | h | 3.510622  | 4.574628 | 1.041041  |
| 49 | h | 1.605176  | 3.603175 | 0.986729  |
| 50 | h | 6.919261  | 2.166533 | 0.193826  |
| 51 | h | -5.755580 | 4.434073 | -0.303143 |
| 52 | h | 5.948057  | 4.347682 | 0.773708  |

Total energy = -3015.3139645350 H = -82050.9144145 eV

#### HOMO-LUMO Separation

HOMO: 123. 123 a -0.09092884 H = -2.47430 eV

LUMO: 124. 124 a +0.10785696 H = +2.93494 eV

Gap : +0.19878580 H = +5.40924 eV

Number of MOs= 742, Electrons= 246.00, Symmetry: c1

\*\*\*\*\*

[(L<sup>H</sup>)Cu<sup>II</sup>]

#### Cartesian Coordinates (Angstroems)

-----

|    |    |           |           |           |
|----|----|-----------|-----------|-----------|
| 1  | c  | 4.613432  | 3.829099  | 0.429954  |
| 2  | c  | 3.255067  | 3.754243  | 0.750612  |
| 3  | c  | 2.593863  | 2.564088  | 0.634770  |
| 4  | c  | 3.266180  | 1.415921  | 0.199992  |
| 5  | c  | 4.632279  | 1.484997  | -0.124317 |
| 6  | c  | 5.286580  | 2.719758  | 0.001605  |
| 7  | c  | 5.315937  | 0.313892  | -0.566207 |
| 8  | c  | 4.653565  | -0.851865 | -0.663558 |
| 9  | c  | 3.268498  | -0.967971 | -0.346752 |
| 10 | c  | 2.549794  | 0.164472  | 0.078998  |
| 11 | o  | 1.316948  | 0.138074  | 0.364465  |
| 12 | cu | -0.003137 | -1.234242 | 0.132987  |
| 13 | n  | 1.451389  | -2.595904 | -0.189529 |

|    |   |           |           |           |
|----|---|-----------|-----------|-----------|
| 14 | c | 2.674035  | -2.244942 | -0.411901 |
| 15 | o | -1.273007 | 0.194949  | -0.076052 |
| 16 | c | -2.537452 | 0.216956  | -0.003690 |
| 17 | c | -3.320808 | -0.928128 | 0.230070  |
| 18 | c | -4.740026 | -0.817561 | 0.295352  |
| 19 | c | -5.375283 | 0.357671  | 0.142727  |
| 20 | c | -4.623555 | 1.544758  | -0.099606 |
| 21 | c | -3.221060 | 1.480916  | -0.174308 |
| 22 | c | -5.245026 | 2.791436  | -0.269617 |
| 23 | c | -4.506336 | 3.916558  | -0.504628 |
| 24 | c | -3.112209 | 3.846479  | -0.579679 |
| 25 | c | -2.482238 | 2.645142  | -0.416238 |
| 26 | c | -2.742619 | -2.206145 | 0.382860  |
| 27 | n | -1.497784 | -2.539900 | 0.371471  |
| 28 | c | -1.200145 | -3.953072 | 0.528289  |
| 29 | c | -0.202637 | -4.439726 | -0.505583 |
| 30 | c | 1.221795  | -4.038232 | -0.199393 |
| 31 | h | -3.460820 | -3.008463 | 0.521695  |
| 32 | h | -2.117473 | -4.530808 | 0.452486  |
| 33 | h | -0.795653 | -4.127293 | 1.523924  |
| 34 | h | 1.482782  | -4.437786 | 0.779894  |
| 35 | h | 1.888464  | -4.507119 | -0.918923 |
| 36 | h | 3.367233  | -3.040523 | -0.669720 |
| 37 | h | -0.235069 | -5.525122 | -0.532407 |
| 38 | h | -0.497306 | -4.087422 | -1.489721 |
| 39 | h | -5.309219 | -1.714656 | 0.474725  |
| 40 | h | -1.412805 | 2.562904  | -0.468896 |
| 41 | h | 5.173584  | -1.737916 | -0.988131 |
| 42 | h | 1.549862  | 2.479280  | 0.871824  |
| 43 | h | -6.447091 | 0.418938  | 0.197727  |
| 44 | h | -2.540119 | 4.737518  | -0.765915 |
| 45 | h | -6.318129 | 2.849296  | -0.212935 |
| 46 | h | 6.360683  | 0.378992  | -0.810816 |
| 47 | h | 2.734499  | 4.633041  | 1.086277  |
| 48 | h | 6.332272  | 2.781443  | -0.244930 |

49 h -5.000174 4.863744 -0.633163  
 50 h 5.131711 4.767543 0.520849

Total energy (BH-LYP/TZVP) = -2864.8750183970 H = -77957.2600756 eV

HOMO-LUMO Separation

HOMO: 229. b 114 a -0.22547944 H = -6.13561 eV

LUMO: 230. a 116 a -0.02246541 H = -0.61132 eV

Gap : +0.20301403 H = +5.52430 eV

Number of MOs= 1408, Electrons= 229.00, Symmetry: c1

| Nr.  | Orbital | Occupation | Energy                  |
|------|---------|------------|-------------------------|
| 233. | b 116 a |            | -0.016602 H = -0.452 eV |
| 232. | a 117 a |            | -0.017380 H = -0.473 eV |
| 231. | b 115 a |            | -0.021545 H = -0.586 eV |
| 230. | a 116 a |            | -0.022465 H = -0.611 eV |
| 229. | b 114 a | 1.000      | -0.225479 H = -6.136 eV |
| 228. | a 115 a | 1.000      | -0.226903 H = -6.174 eV |
| 227. | b 113 a | 1.000      | -0.231836 H = -6.309 eV |
| 226. | a 114 a | 1.000      | -0.232210 H = -6.319 eV |

9 a excitation

Total energy: -2864.741987374411  
 Excitation energy: 0.1330308455892483  
 Excitation energy / eV: 3.619955042159133  
 Excitation energy / nm: 342.5021652548413  
 Excitation energy / cm<sup>(-1)</sup>: 29196.89570740900

Oscillator strength:

velocity representation: 0.1870411260227904E-01  
 length representation: 0.2030898544781044E-01  
 mixed representation: 0.1909149940461962E-01

Dominant contributions:

| occ. orbital | energy / eV | virt. orbital | energy / eV | coeff.  <sup>2</sup> *100 |
|--------------|-------------|---------------|-------------|---------------------------|
| 115 a alpha  | -6.17       | 116 a alpha   | -0.61       | 29.5                      |
| 114 a beta   | -6.14       | 115 a beta    | -0.59       | 29.5                      |



|       |       |       |       |       |       |      |
|-------|-------|-------|-------|-------|-------|------|
| 114 a | alpha | -6.32 | 117 a | alpha | -0.47 | 14.0 |
| 113 a | beta  | -6.31 | 116 a | beta  | -0.45 | 12.4 |
| 114 a | alpha | -6.32 | 116 a | alpha | -0.61 | 4.1  |
| 113 a | beta  | -6.31 | 115 a | beta  | -0.59 | 3.7  |

12 a excitation

Total energy: -2864.735247703416  
Excitation energy: 0.1397705165842354  
Excitation energy / eV: 3.803350899659184  
Excitation energy / nm: 325.9868659964519  
Excitation energy / cm<sup>-1</sup>: 30676.08251007329  
Oscillator strength:  
velocity representation: 0.3356977902846983  
length representation: 0.3363516239450085  
mixed representation: 0.3360161512511329

Dominant contributions:

| occ. orbital | energy / eV | virt. orbital | energy / eV | coeff.  <sup>2</sup> *100 |       |      |
|--------------|-------------|---------------|-------------|---------------------------|-------|------|
| 114 a        | beta        | -6.14         | 116 a       | beta                      | -0.45 | 26.3 |
| 115 a        | alpha       | -6.17         | 117 a       | alpha                     | -0.47 | 26.2 |
| 114 a        | alpha       | -6.32         | 116 a       | alpha                     | -0.61 | 20.3 |
| 113 a        | beta        | -6.31         | 115 a       | beta                      | -0.59 | 17.5 |

\*\*\*\*\*

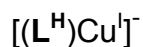

Cartesian Coordinates (Angstroems)

-----

|   |   |           |           |          |
|---|---|-----------|-----------|----------|
| 1 | c | -2.985188 | -2.681373 | 0.407769 |
| 2 | c | -3.590993 | -1.439165 | 0.203333 |
| 3 | c | -4.994366 | -1.350573 | 0.162260 |
| 4 | c | -5.743114 | -2.529073 | 0.329119 |
| 5 | c | -5.128903 | -3.733918 | 0.528055 |
| 6 | c | -3.734435 | -3.816179 | 0.568800 |
| 7 | c | -2.738506 | -0.253693 | 0.037700 |

|    |    |           |           |           |
|----|----|-----------|-----------|-----------|
| 8  | c  | -3.418403 | 0.982077  | -0.177950 |
| 9  | c  | -4.833314 | 1.010064  | -0.198792 |
| 10 | c  | -5.610789 | -0.085737 | -0.043579 |
| 11 | o  | -1.503527 | -0.382895 | 0.097103  |
| 12 | cu | 0.039887  | 1.082118  | -0.316413 |
| 13 | n  | -1.500183 | 2.481955  | -0.416124 |
| 14 | c  | -1.110691 | 3.867993  | -0.529617 |
| 15 | c  | -0.126572 | 4.298155  | 0.557022  |
| 16 | c  | 1.334444  | 4.015338  | 0.250815  |
| 17 | n  | 1.648351  | 2.613265  | 0.126869  |
| 18 | c  | 2.798638  | 2.243896  | 0.527779  |
| 19 | c  | 3.410980  | 0.953984  | 0.428500  |
| 20 | c  | 4.717046  | 0.825487  | 0.955781  |
| 21 | c  | 5.439741  | -0.317328 | 0.906336  |
| 22 | c  | 4.873768  | -1.468778 | 0.296264  |
| 23 | c  | 3.573605  | -1.401540 | -0.238125 |
| 24 | c  | 2.788770  | -0.163915 | -0.194775 |
| 25 | c  | 5.569383  | -2.688402 | 0.210479  |
| 26 | c  | 5.002597  | -3.785027 | -0.375151 |
| 27 | c  | 3.709209  | -3.713938 | -0.901398 |
| 28 | c  | 3.013378  | -2.537609 | -0.829919 |
| 29 | o  | 1.644131  | -0.158683 | -0.692976 |
| 30 | c  | -2.749702 | 2.232756  | -0.340803 |
| 31 | h  | -3.434446 | 3.082846  | -0.401748 |
| 32 | h  | -1.992125 | 4.512699  | -0.486157 |
| 33 | h  | -0.647408 | 4.028007  | -1.502327 |
| 34 | h  | 1.571541  | 4.505709  | -0.695625 |
| 35 | h  | 1.958324  | 4.493550  | 1.012560  |
| 36 | h  | 3.441560  | 2.991825  | 1.004238  |
| 37 | h  | -0.221931 | 5.373843  | 0.695144  |
| 38 | h  | -0.409656 | 3.830173  | 1.495202  |
| 39 | h  | -5.306780 | 1.968053  | -0.351217 |
| 40 | h  | -1.911085 | -2.708338 | 0.432585  |
| 41 | h  | 5.151459  | 1.698802  | 1.417898  |
| 42 | h  | 2.015782  | -2.450067 | -1.219626 |

|    |   |           |           |           |
|----|---|-----------|-----------|-----------|
| 43 | h | -6.684032 | -0.015783 | -0.069388 |
| 44 | h | -3.254695 | -4.766584 | 0.725061  |
| 45 | h | -6.818267 | -2.467498 | 0.297962  |
| 46 | h | 6.432643  | -0.367259 | 1.317474  |
| 47 | h | 3.264330  | -4.581336 | -1.356939 |
| 48 | h | 6.564987  | -2.745158 | 0.618216  |
| 49 | h | -5.722200 | -4.624040 | 0.653615  |
| 50 | h | 5.553184  | -4.709135 | -0.429280 |

Total energy (BH-LYP/TZVP) = -2864.9144544870 H = -77958.3331868 eV

#### HOMO-LUMO Separation

HOMO: 115. 115 a -0.09626066 H = -2.61939 eV

LUMO: 116. 116 a +0.10414410 H = +2.83391 eV

Gap : +0.20040477 H = +5.45329 eV

Number of MOs= 704, Electrons= 230.00, Symmetry: c1
